# Supplementary material for: Epitaxial growth of vertically aligned ZnO nanowires for bidirectional direct-current driven light-emitting diodes applications
Source: Royal Society of Chemistry journal article supplement (doi:10.1039/c4ce01788a), 2014-10-07
Supplement: c4ce01788a1.pdf [file c4ce01788a1.pdf]

## SUPPORTING INFORMATION

# Epitaxial growth of vertically aligned ZnO nanowires for bidirectional direct-current driven light-emitting diodes applications

Zhi-Feng Shi, Yuan-Tao Zhang,\* Xi-Jun Cui, Shi-Wei Zhuang, Bin Wu, Jun-Yan Jiang, Xian-Wei Chu, Xin Dong, Bao-Lin Zhang,\* Guo-Tong Du

<sup>1</sup>State Key Laboratory on Integrated Optoelectronics, College of Electronic Science and Engineering, Jilin University, Qianjin Street 2699, Changchun 130012, People's Republic of China

---

a) Author to whom correspondence should be addressed. Electronic mail: [zhangyt@jlu.edu.cn](mailto:zhangyt@jlu.edu.cn), [zbl@jlu.edu.cn](mailto:zbl@jlu.edu.cn)

**Table S1. Preparation conditions of four samples**

| Sample | Stage I |        |       | Stage II |        |         |                |
|--------|---------|--------|-------|----------|--------|---------|----------------|
|        | No.     | T (°C) | t (s) | P (Pa)   | T (°C) | t (min) | P (Pa)         |
| S1     | –       | –      | –     | 750      | 30     | 77      | 0 <sup>a</sup> |
| S2     | 570     | 30     | 77    | 750      | 30     | 77      | 0              |
| S3     | 570     | 30     | 77    | 750      | 30     | 1600    | 0              |
| S4     | 570     | 30     | 77    | 750      | 30     | 1600    | 3000           |

<sup>a</sup>LI is short for light irradiation intensity.

## Generation mechanisms of electrons in reverse-biased mode

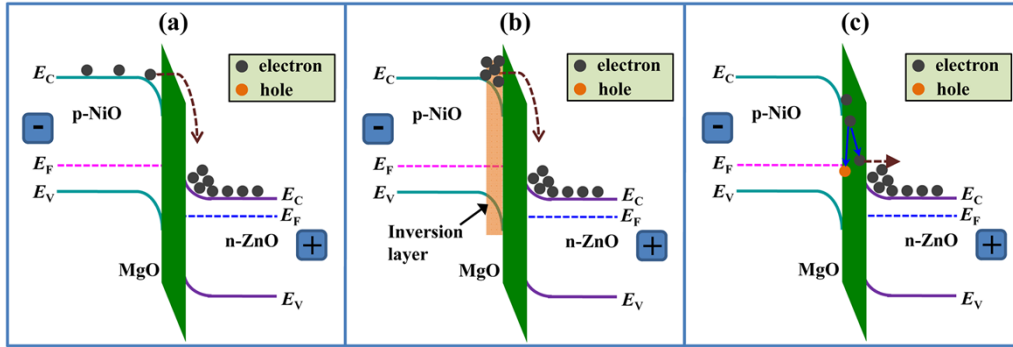

FIG. S1. (a) Electrons injected from the conduction band of p-NiO to that of ZnO. (b) Electrons injected from an inversion layer of electrons formed at NiO/MgO interface. (c) Generation of electron-hole pairs through the impact ionization process.

## Generation mechanisms of holes in reverse-biased mode

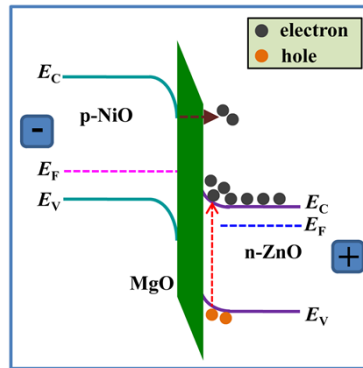

FIG. S2. Generation of electrons and holes in n-ZnO layer by accelerated electrons.
